# Supplementary material for: Differences in Mutational Profile between Follicular Thyroid Carcinoma and Follicular Thyroid Adenoma Identified Using Next Generation Sequencing
Source: PubMed Central journal article supplement (PMC6651591; doi:10.3390/ijms20133126), 2019-06-26
Supplement: ijms-20-03126-s001.pdf [file ijms-20-03126-s001.pdf]

| Entity       | AAE        | Type             | Alteration<br>(physical<br>location) | dbSNP<br>or rs            | COSMIC<br>Mutation ID | Previously reported | Number<br>of FTC<br>patients<br>with the<br>mutation<br>(n)                                                                                              | Number of<br>FTA<br>patients<br>with the<br>mutation<br>(n) |    |
|--------------|------------|------------------|--------------------------------------|---------------------------|-----------------------|---------------------|----------------------------------------------------------------------------------------------------------------------------------------------------------|-------------------------------------------------------------|----|
| <i>APC</i>   | FTC        | p.Thr1493<br>Thr | synonymous                           | chr5:112175<br>770 G>A    | rs41115               | -                   | Familial colorectal cancer<br>Familial adenomatous polyposis<br>1<br>Hereditary cancer-predisposing<br>syndrome<br>APC-Associated Polyposis<br>Disorders | 4                                                           | 1  |
| <i>CSF1R</i> | FTC<br>FTA | -                | 3 prime UTR<br>variant               | chr5:149433<br>596 T>G    | rs206693<br>4         | -                   | Hereditary diffuse<br>leukoencephalopathy with<br>spheroids                                                                                              | 6                                                           | 5  |
| <i>ERBB4</i> | FTC<br>FTA | -                | intron variant                       | chr2:212812<br>097        | rs839541              | -                   | -                                                                                                                                                        | 3                                                           | 2  |
| <i>FGFR3</i> | FTC<br>FTA | p.Thr653T<br>hr  | synonymous                           | chr4:180789<br>4<br>G>A   | rs768860<br>9         | -                   | Craniosynostosis                                                                                                                                         | 7                                                           | 7  |
| <i>FLT3</i>  | FTC<br>FTA | c.1310-<br>3T>C  | splice region                        | chr13:28610<br>183<br>A>G | rs249123<br>1         | -                   | -                                                                                                                                                        | 18                                                          | 10 |
| <i>FLT3</i>  | FTC        | -                | intron variant                       | chr13:28602<br>292        | rs755808<br>65        | -                   | -                                                                                                                                                        | 5                                                           | 0  |

| T>C                |            |             |                |                              |               |            |                                                                                                                                                           |    |    |
|--------------------|------------|-------------|----------------|------------------------------|---------------|------------|-----------------------------------------------------------------------------------------------------------------------------------------------------------|----|----|
| <i>HRAS</i>        | FTC<br>FTA | p.His27His  | synonymous     | chr11:53424<br>2<br>A>G//T>C | rs12628       | COSM249860 | Costello syndrome<br>Rasopathy                                                                                                                            | 6  | 7  |
| <i>KDR</i>         | FTC<br>FTA | -           | intron variant | chr4:559802<br>39            | rs769279<br>1 | -          | -                                                                                                                                                         | 3  | 2  |
| <i>PDGFR<br/>A</i> | FTC<br>FTA | p.Val824Val | synonymous     | chr4:551520<br>40<br>C>T     | rs222823<br>0 | COSM22413  | Gastrointestinal stroma tumor;<br>Idiopathic hypereosinophilic<br>syndrome                                                                                | 3  | 2  |
| <i>PDGFR<br/>A</i> | FTC<br>FTA | p.Pro567Pro | synonymous     | chr4:551410<br>55<br>A>G     | rs187377<br>8 | -          | Gastrointestinal stroma tumor;<br>Idiopathic hypereosinophilic<br>syndrome                                                                                | 4  | 5  |
| <i>RET</i>         | FTC<br>FTA | p.Leu769Leu | synonymous     | chr10:43613<br>843 G>T       | rs180086<br>1 | -          | Multiple endocrine neoplasia,<br>type 2                                                                                                                   | 11 | 10 |
| <i>RET</i>         | FTC<br>FTA | p.Ser904Ser | synonymous     | chr10:43615<br>633<br>C>G    | rs180086<br>3 | -          | Pheochromocytoma; Renal<br>adysplasia; Hereditary cancer-<br>predisposing syndrome;<br>Multiple endocrine neoplasia;<br>Hirschsprung Disease,<br>Dominant | 5  | 3  |
| <i>TP53</i>        | FTC        | p.Pro72Arg  | missense       | chr17:75794<br>72<br>G>C     | rs104252<br>2 | -          | Li-Fraumeni syndrome;<br>Hereditary cancer-predisposing<br>syndrome                                                                                       | 10 | 0  |
